# Supplementary material
Source: PubMed Central journal article supplement (PMC6495242)
Supplement: jnm223537SupplementalData.pdf [file jnm223537SupplementalData.pdf]

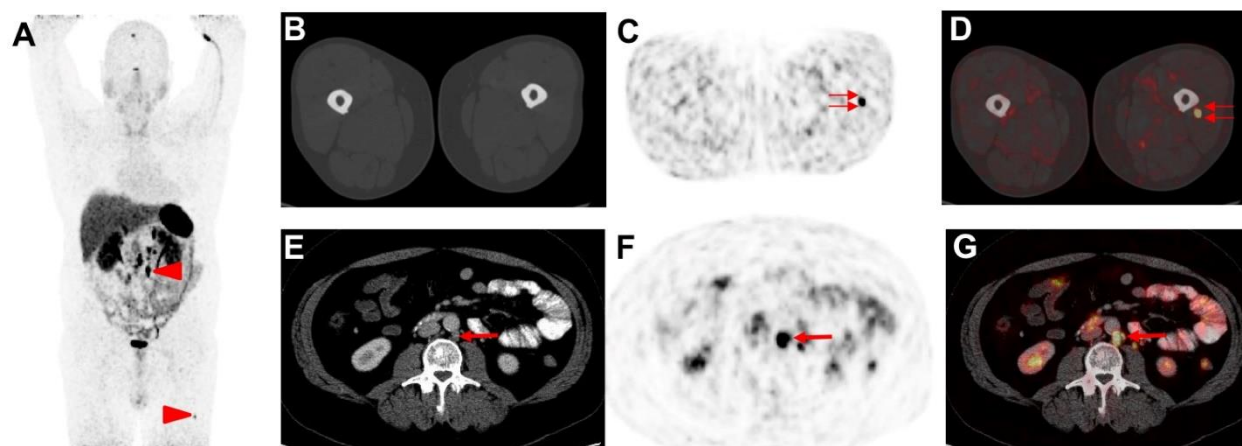

**Supplemental Figure 1. Example for an Overall Assessment using somatostatin receptor (SSTR)-Reporting and Data System (SSTR-RADS) Version 1.0 (22), with an Overall SSTR-RADS Score of 5 (Supplemental Table 1).**

53 year old male with history of proven gastroenteropancreatic NET who underwent  $^{68}\text{Ga}$ -DOTATOC PET/CT for restaging. (A) Whole body maximum intensity projection image demonstrates suspicious radiotracer uptake (arrowheads). On (B) axial CT, (C) axial PET, and (D) axial PET/CT, intense radiotracer uptake in the left *musculus vastus lateralis* is seen (double thin arrows). This has been classified as SSTR-RADS-3C by an experienced reader and further workup was recommended. On (E) axial CT, (F) axial PET, and (G) axial PET/CT, intense radiotracer uptake is visualized in a retroperitoneal lymph node (arrow). As this site of radiotracer uptake shows corresponding findings on (E) axial CT, this finding was classified as SSTR-RADS-5 and therefore, the overall SSTR-RADS score was 5 (Supplemental Table 1).

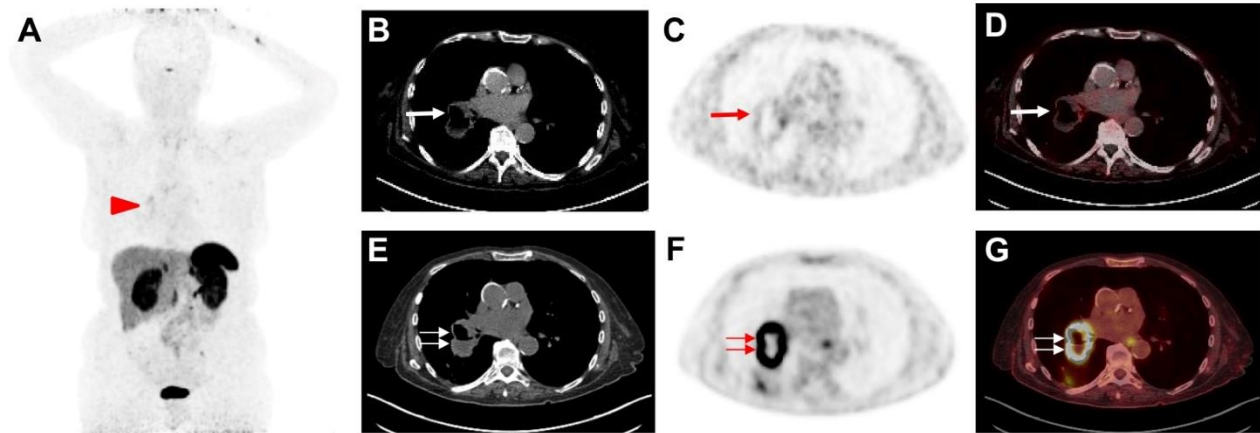

**Supplemental Figure 2. Example for an Overall Assessment using somatostatin receptor (SSTR)-Reporting and Data System (SSTR-RADS) Version 1.0 (22), with target lesion evaluated as SSTR-RADS-3D (Supplemental Table 1).**

68 year old female with history of proven lung neuroendocrine tumor who underwent 68Ga-DOTATOC PET/CT for restaging (A-D). (A) Whole body maximum intensity projection image demonstrates only moderate radiotracer uptake (arrowhead). On (B) axial CT, (C) axial PET, and (D) axial PET/CT, only modest radiotracer uptake is seen on the medial wall portion of the primary in the lung (red arrow). This has been classified as SSTR-RADS-3D by an experienced reader and further workup was recommended (Supplemental Table 1). Panels (E-G) display the succeeding 18F-FDG scan two weeks later. On (E) axial CT, (F) axial PET, and (G) axial PET/CT, intense radiotracer uptake is visualized in the lesion (double thin red arrows), which had shown almost no uptake on 68Ga-DOTATOC PET (flip-flop phenomenon).

| MI-RADS classification | PSMA- and SSTR-RADS (19,22)                                                                                                                                                                             | Certainty of Malignancy   | Workup | Uptake Level <sup>#</sup> | PRRT/RLT?      |
|------------------------|---------------------------------------------------------------------------------------------------------------------------------------------------------------------------------------------------------|---------------------------|--------|---------------------------|----------------|
| 1                      | 1A ✓ Benign lesion, characterized by biopsy or anatomic imaging <i>without</i> abnormal uptake                                                                                                          | Definitively benign       | n/a    | 1                         | N              |
|                        | 1B ✓ Benign lesion, characterized by biopsy or anatomic imaging <i>with</i> abnormal uptake                                                                                                             |                           | n/a    | 2-3                       | N              |
| 2                      | ✓ Focal (low-level) uptake in a <i>soft tissue</i> site or <i>bone</i> lesion <i>atypical</i> for metastatic PCa or NEN                                                                                 | Likely benign             | n/a    | 1                         | N              |
| 3                      | 3A ✓ Equivocal uptake in <i>soft tissue lesion typical</i> of PCa or NEN                                                                                                                                | Equivocal                 | B, F/U | 1-2                       | N              |
|                        | 3B ✓ Equivocal uptake in <i>bone lesion not atypical</i> of PCa or NEN                                                                                                                                  |                           | B, F/U | 1-2                       | N              |
|                        | 3C ✓ Intense uptake in site <i>highly atypical</i> of all but advanced stages of PCa or NEN (i.e., high likelihood of nonprostatic/non-NET malignancy or other benign tumor)                            |                           | B      | 3                         | N              |
|                        | 3D ✓ Lesion <i>suggestive of malignancy</i> on anatomic imaging but <i>lacking uptake</i> . For SSTR-RADS, an 18F-FDG PET/CT is recommended to rule out potential dedifferentiation of a single lesion. |                           | B, F/U | not available             | N <sup>§</sup> |
| 4                      | ✓ Intense uptake in site typical of PCa or NEN but <i>lacking</i> definitive findings on conventional imaging                                                                                           | Highly likely for PCa/NEN | n/a    | 3                         | Y              |
| 5                      | ✓ Intense uptake in site typical of PCa or NEN and <i>with</i> definitive findings on conventional imaging                                                                                              | Definitively PCa/NEN      | n/a    | 3                         | Y              |

**Supplemental Table 1.** Head-to-head comparison of both reporting and data systems (RADS) in molecular imaging (MI-RADS), which are Prostate-membrane specific antigen (PSMA)-RADS for evaluation of prostate cancer (PCa) and Somatostatin receptor (SSTR)-RADS for neuroendocrine neoplasias (NEN). PRRT = peptide receptor radionuclide therapy. RLT = radioligand therapy. N = No

(endoradiotherapy not recommended). NEN = neuroendocrine neoplasias. B = Biopsy, F/U = follow-up imaging (3-6 months, e.g. depending on Ki67 in NEN). Y = Yes (endoradiotherapy recommended). # = applies only to SSTR-RADS. § = combined treatment may be applicable (e.g. in a G2 NEN patient with entirely all lesions demonstrating SSTR expression, but a single dedifferentiated lesion, a combined treatment of PRRT together with a locoregional procedure can be considered). Modified from *Werner et al., (23)*.
